# Supplementary material for: Thermoelectric properties of highly-mismatched alloys of GaNxAs1−xfrom first- to second-principles methods: energy conversion
Source: Royal Society of Chemistry journal article supplement (doi:10.1039/c6ra14685f), 2016-01-01
Supplement: c6ra14685f1.pdf [file c6ra14685f1.pdf]

## Thermoelectric properties of highly-mismatched alloys $\text{GaN}_x\text{As}_{1-x}$ from first- to second-principles methods: Energy Conversion

A. H. Reshak<sup>1,2\*</sup>

<sup>1</sup>*New Technologies - Research Centre, University of West Bohemia, Univerzitni 8, 306 14 Pilsen, Czech republic*

<sup>2</sup>*Center of Excellence Geopolymer and Green Technology, School of Material Engineering, University Malaysia Perlis, 01007 Kangar, Perlis, Malaysia*

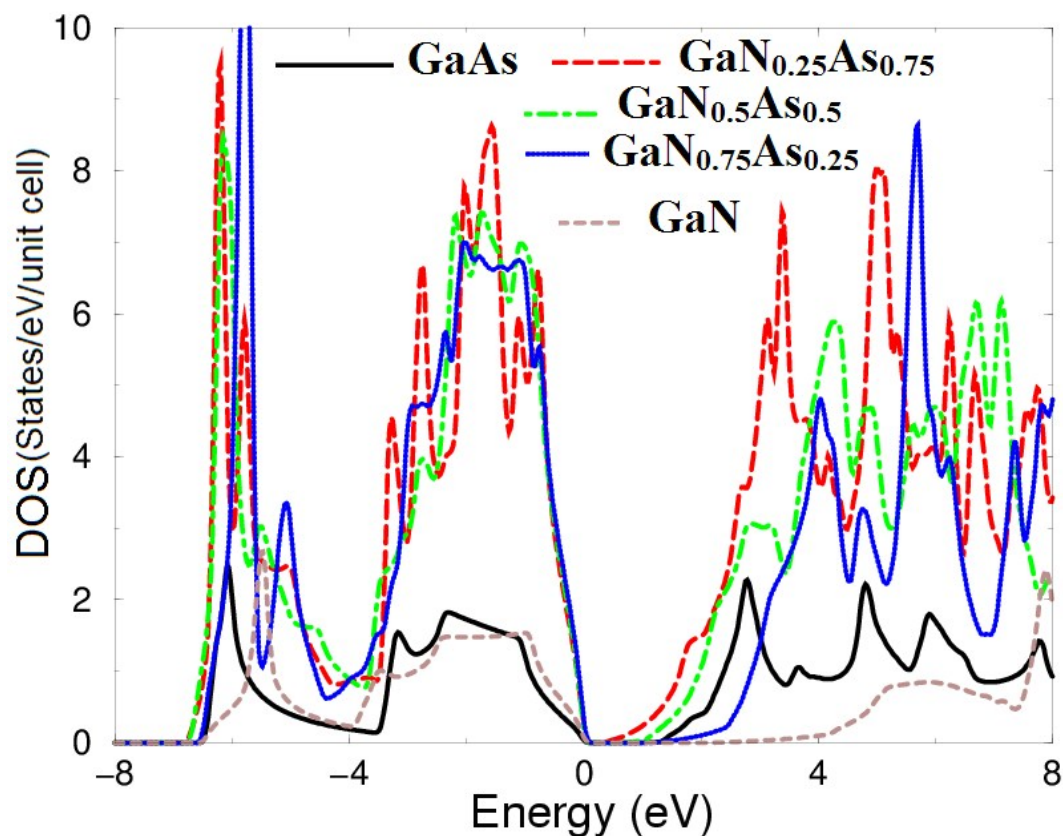

Fig. S1:

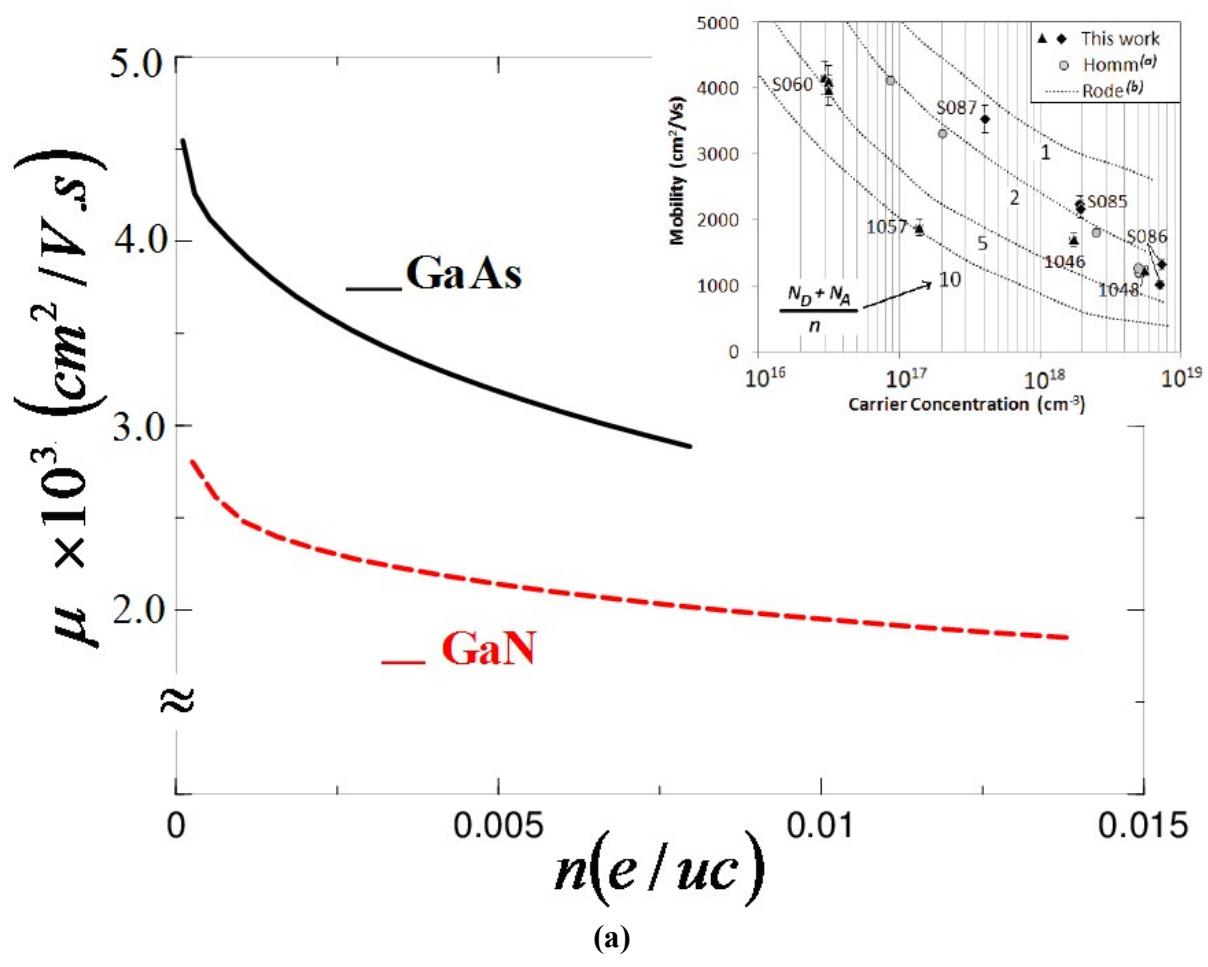

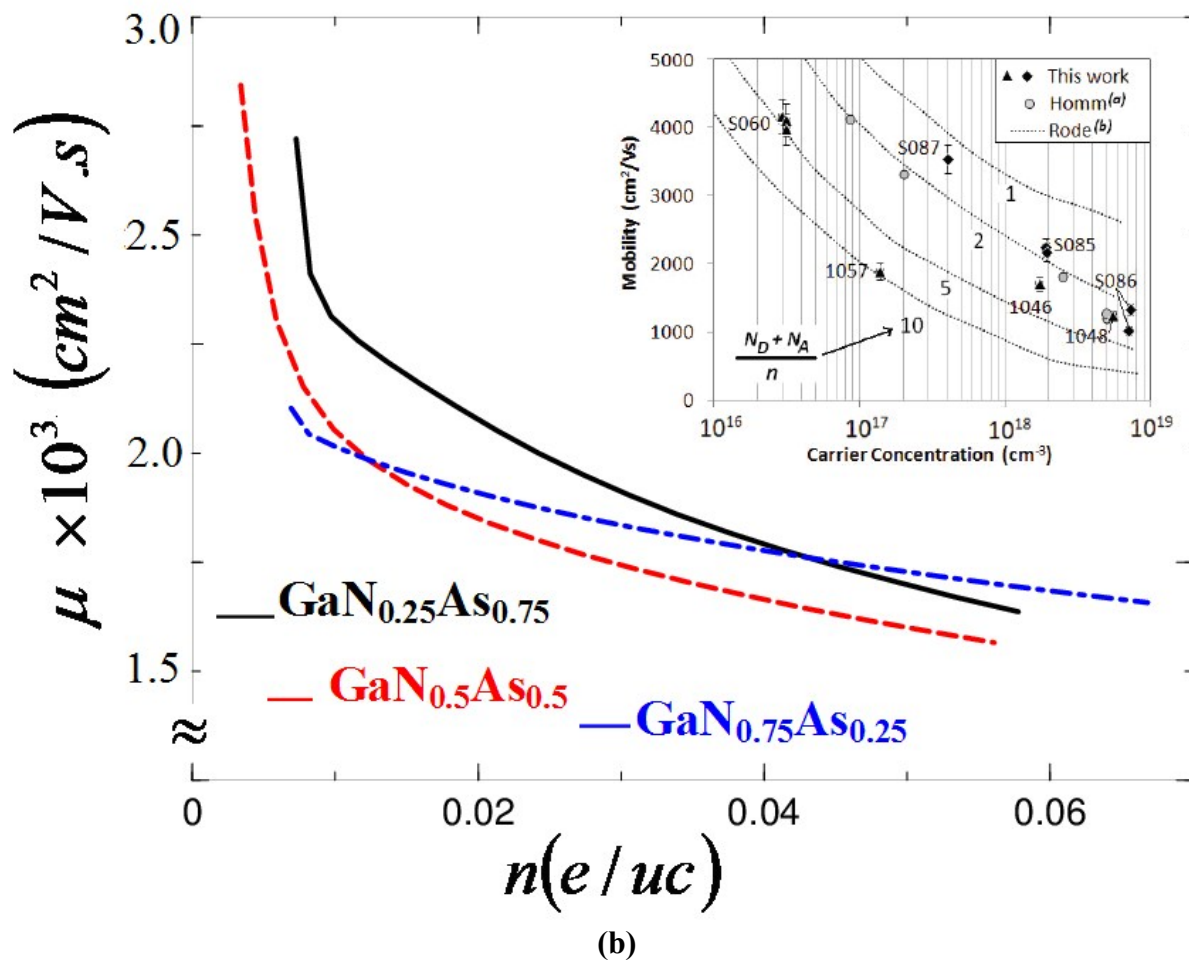

Fig. S2:

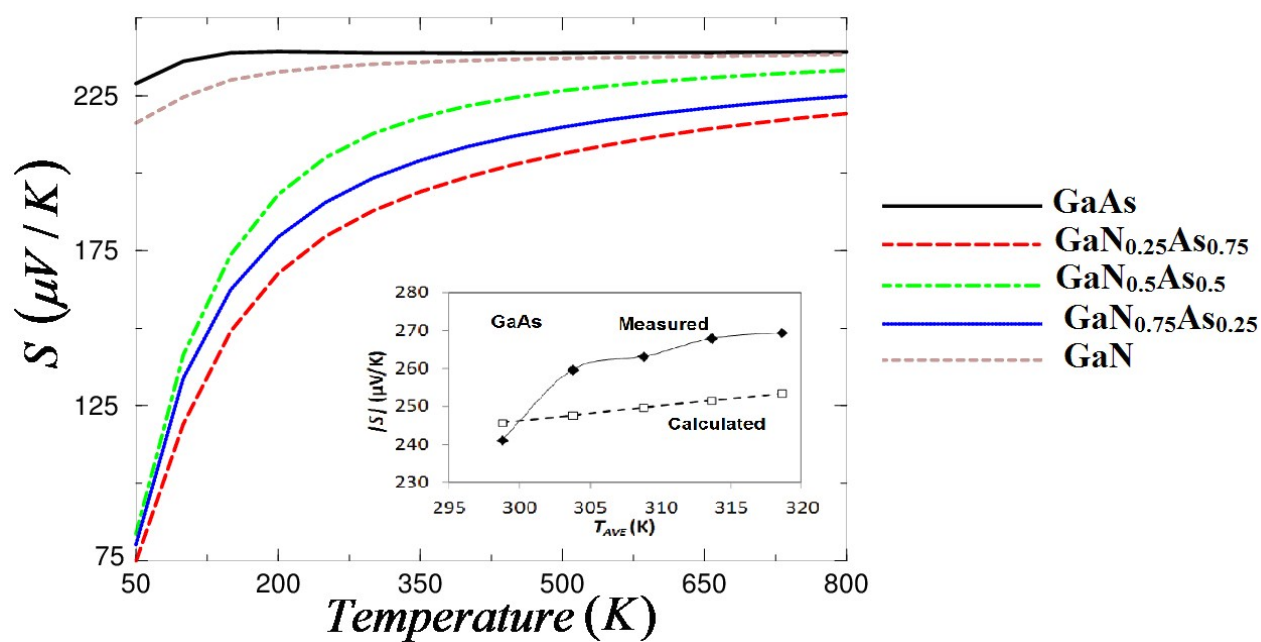

Fig. S3:

## Supplementary materials

**Fig. S1:** Calculated density of states for  $\text{GaN}_x\text{As}_{1-x}$  ( $x=0.0, 0.25, 0.5, 0.75$  and  $1.0$ ) alloys. Which clearly show that replacing As atoms by N atoms cause significant influence in the density of states.

**Fig. S2: (a, b)** Calculated carrier's mobility vs. carrier's concentration of  $\text{GaN}_x\text{As}_{1-x}$  ( $x=0.0, 0.25, 0.5, 0.75$  and  $1.0$ ) alloys. We have compared our results with the previous experimental data for GaAs [58-60] good agreement was found.

**Fig. S3:** Calculated Seebeck coefficient vs. temperature. We have compared our calculated  $S$  of  $\text{GaN}_x\text{As}_{1-x}$  ( $x=0.0, 0.25, 0.5, 0.75$  and  $1.0$ ) alloys to the measured and calculated  $S$  for GaAs [58]. It has been found that the increase in the calculated  $S$  for  $\text{GaN}_x\text{As}_{1-x}$  ( $x=0.0, 0.25, 0.5, 0.75$  and  $1.0$ ) with increasing the temperature is consistent with previously measured and calculated  $S$  of GaAs [58], good agreement was found.

### References:

[58] <https://escholarship.org/uc/item/2h7846vd.pdf>

[59] G. Homm, P. J. Klar, J. Teubert, and W. Heimbrod. Seebeck coefficients of n-type (Ga,In)(N,As), (B,Ga,In)As, and GaAs. Applied Physics Letters, 93:042107, 2008.

[60] D. L. Rode and S. Knight. Electron transport in GaAs. Physical Review B, 3(8):2534, 1971.
